# Supplementary material for: Double carbapenem as a rescue strategy for the treatment of severe carbapenemase-producing Klebsiella pneumoniae infections: a two-center, matched case–control study
Source: PubMed Central journal article supplement (PMC5498909; doi:10.1186/s13054-017-1769-z), 2017-07-05

**eFigure 1**

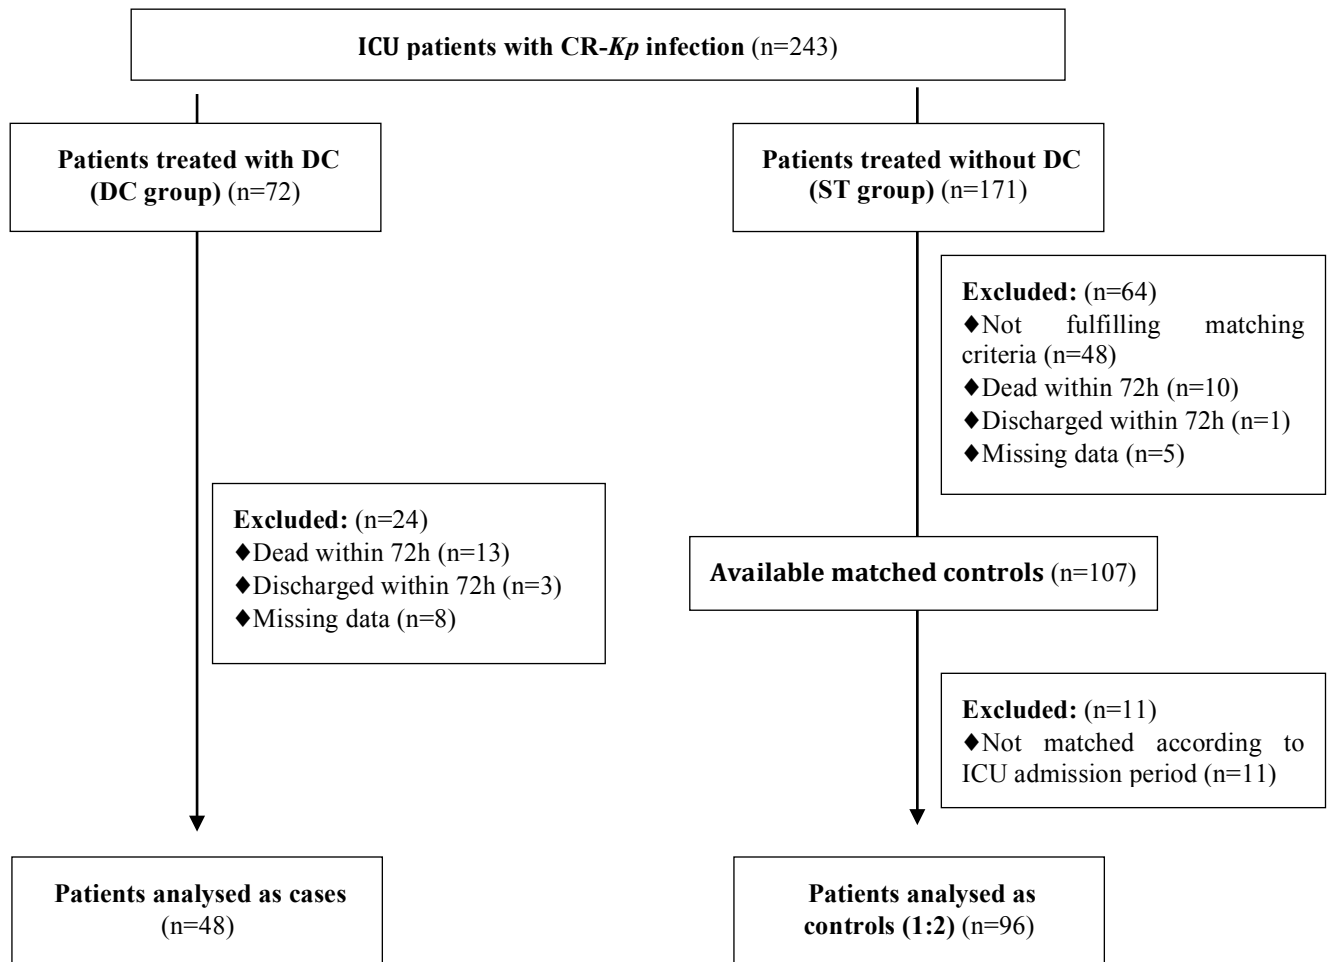

Supplement: 13054_2017_1769_MOESM1_ESM.pdf [file 13054_2017_1769_MOESM1_ESM.pdf]
